# Supplementary material for: COVID-19 Vaccine Antibody Response in a Single-Center Urban Hemodialysis Unit
Source: MDPI journal article supplement (doi:10.3390/vaccines11071252), 2023-07-18
Supplement: s1 [file s1]

## Supplemental Material

**Table S1. Baseline characteristics of the enrolled patients.**

| Characteristic                   |                                               | Total      | COVID-19<br>Naïve<br>N=22 | Previous<br>COVID-19<br>infection<br>N=8 | p- Value |
|----------------------------------|-----------------------------------------------|------------|---------------------------|------------------------------------------|----------|
| Age (year)                       |                                               | 61.2±2.6   | 60.5±3.3                  | 63.1±3.7                                 | 0.66     |
| Female Sex no. (%)               |                                               | 14 (46.7%) | 8 (36.4%)                 | 6 (75%)                                  | 0.06     |
| African American<br>race no. (%) |                                               | 29 (96.7%) | 21 (95.5%)                | 8 (100%)                                 | 0.54     |
| Time on dialysis<br>(year)       |                                               | 4.6±0.7    | 4.5±0.9                   | 4.9±1.1                                  | 0.84     |
| Comorbidities                    |                                               |            |                           |                                          |          |
|                                  | Hypertension no. (%)                          | 18 (60%)   | 13 (59.1%)                | 5 (62.5%)                                | 0.87     |
|                                  | Diabetes no. (%)                              | 16 (53%)   | 10 (45.5%)                | 6 (75%)                                  | 0.15     |
|                                  | Obesity no. (%)                               | 1 (3.3%)   | 0 (0%)                    | 1 (12.5%)                                | 0.09     |
|                                  | Chronic heart failure no.<br>(%)              | 3 (10%)    | 2 (9.1%)                  | 1 (12.5%)                                | 0.78     |
|                                  | COPD no. (%)                                  | 0          | 0                         | 0                                        |          |
|                                  | Cirrhosis no. (%)                             | 0          | 0                         | 0                                        |          |
|                                  | On immune suppressive<br>medicine             | 0          | 0                         | 0                                        |          |
|                                  | Autoimmune disease                            | 0          | 0                         | 0                                        |          |
|                                  | Cancer                                        | 3 (10%)    | 3 (13.6%)                 | 0 (0 %)                                  | 0.27     |
|                                  | Active smoking no. (%)                        | 1 (3.3%)   | 1 (4.6%)                  | 0                                        | 0.54     |
|                                  | Active Drug abuse no.<br>(%)                  | 0          | 0                         | 0                                        |          |
|                                  | Active Alcohol abuse no.<br>(%)               | 0          | 0                         | 0                                        |          |
| Types of vaccine                 |                                               |            |                           |                                          | 0.44     |
|                                  | BNT162b2mRNA                                  | 28 (93.3%) | 21 (95.5%)                | 7 (87.5%)                                |          |
|                                  | mRNA-1273                                     | 2 (6.7%)   | 1 (4.5%)                  | 1 (12.5%)                                |          |
| Vaccine interval                 |                                               |            |                           |                                          |          |
|                                  | Between the first and<br>second dose (days)   | 32 ±5      | 36 ±7                     | 23 ± 1                                   | 0.27     |
|                                  | Between the second<br>and third dose (months) | 6 ± 0.4    | 6 ± 0.4                   | 7 ± 0.9                                  | 0.18     |

**Table S2. Multiple logistic analysis comparing vaccine non-responders to responders in COVID-19 naïve group.**

| Risk factor      |          | Adjusted OR | CI          | p- Value |
|------------------|----------|-------------|-------------|----------|
| Age              | Per year | 1.2         | 0.77-1.80   | 0.46     |
| Sex              | Female   | 0.97        | 0.04-24.41  | 0.99     |
| Time on Dialysis | Per year | 1.34        | 0.74- 2.44  | 0.33     |
| Hypertension     | If yes   | 0.11        | 0.00-29.23  | 0.43     |
| Diabetes         | If yes   | 0.21        | 0.00-152.58 | 0.64     |
